# Supplementary material for: Effects of low-to-moderate ethanol consumption on colonic growth and gene expression in young adult and middle-aged male rats
Source: PubMed Central journal article supplement (PMC7743962; doi:10.1371/journal.pone.0243499), 2020-12-16
Supplement: pone.0243499.s001.pdf [file pone.0243499.s001.pdf]

Ethanol study

| Totalcell            | TotalPC | BPC  | MPC  | TPC  | Highest | TotalPI | BPI   | MPI  |
|----------------------|---------|------|------|------|---------|---------|-------|------|
| 30.83                | 3.11    | 0.83 | 0.06 | 0    | 11.39   | 10.09   | 2.69  | 0.19 |
| 32.9                 | 3.16    | 1.96 | 1.2  | 0    | 13      | 9.6     | 5.96  | 3.65 |
| 31.4                 | 4.1     | 2.53 | 1.57 | 0    | 12.92   | 13.06   | 8.06  | 5    |
| 30.82                | 4.1     | 2.53 | 1.57 | 0    | 14.38   | 13.3    | 8.21  | 5.09 |
| Tissue block damaged |         |      |      |      |         |         |       |      |
| 33.5                 | 3.5     | 2.25 | 1.25 | 0    | 11.41   | 10.45   | 6.72  | 3.73 |
| 30.72                | 4.07    | 2.97 | 1.07 | 0.03 | 15      | 13.25   | 9.67  | 3.48 |
| 30                   | 8       | 5.5  | 2.5  | 0    | 13.75   | 26.67   | 18.33 | 8.33 |
| 29.53                | 5.41    | 3.76 | 1.53 | 0.12 | 15.82   | 18.32   | 12.73 | 5.18 |
| 30.59                | 3.9     | 2.85 | 1.05 | 0    | 11      | 12.75   | 9.32  | 3.43 |
| Tissue block damaged |         |      |      |      |         |         |       |      |
| Tissue block damaged |         |      |      |      |         |         |       |      |
| 30.62                | 3.15    | 2.12 | 1.03 | 0    | 10.56   | 10.29   | 6.92  | 3.36 |
| 36.6                 | 0.6     | 0.6  | 0    | 0    | 8       | 1.64    | 1.64  | 0    |
| 30.09                | 2.36    | 2.18 | 0.18 | 0    | 6.36    | 7.84    | 7.24  | 0.6  |
| 31.48                | 2.13    | 1.5  | 0.63 | 0    | 12.2    | 6.77    | 4.76  | 2    |
| 29.05                | 2.88    | 1.98 | 0.85 | 0.05 | 9.2     | 9.91    | 6.82  | 2.93 |
| 28.5                 | 3       | 2.5  | 0.5  | 0    | 8.78    | 10.53   | 8.77  | 1.75 |
| 29                   | 4       | 4    | 0    | 0    | 9       | 13.79   | 13.79 | 0    |
| 30.56                | 4       | 2.78 | 1.22 | 0    | 11.33   | 13.09   | 9.1   | 3.99 |
| 30.72                | 3.8     | 2.84 | 0.96 | 0    | 10.6    | 12.37   | 9.24  | 3.13 |
| Tissue block damaged |         |      |      |      |         |         |       |      |

| TPI | PZ   | DC    | DCbottom | DCmiddle | DCtop | DI   | DIbottom | DImiddle |      |
|-----|------|-------|----------|----------|-------|------|----------|----------|------|
|     | 0    | 36.94 | 7.21     | 1.08     | 2.42  | 3.71 | 22.5     | 3.37     | 7.55 |
|     | 0    | 39.51 | 6.64     | 0.48     | 2.68  | 3.48 | 18.97    | 1.37     | 7.66 |
|     | 0    | 41.15 | 8        | 1.64     | 2.96  | 3.4  | 25.71    | 5.27     | 9.51 |
|     | 0    | 46.66 | 6.99     | 1.17     | 2.52  | 3.39 | 22.36    | 3.74     | 8.06 |
|     | 0    | 34.06 | 7.74     | 1.32     | 3     | 3.86 | 23.58    | 4.02     | 9.14 |
|     | 0.1  | 48.83 | 7.04     | 1.04     | 2.87  | 3.17 | 20.21    | 2.99     | 8.24 |
|     | 0    | 45.83 |          |          |       |      |          |          |      |
|     | 0.41 | 53.57 | 5.74     | 0.65     | 2.09  | 3    | 18.34    | 2.08     | 6.68 |
|     | 0    | 35.96 | 6.87     | 1.43     | 2.22  | 3.22 | 22.64    | 4.71     | 7.31 |
|     | 0    | 34.49 | 7.42     | 1.29     | 2.54  | 3.58 | 22.74    | 3.95     | 7.78 |
|     | 0    | 21.86 | 6.86     | 0.73     | 2.64  | 3.5  | 19.28    | 2.05     | 7.42 |
|     | 0    | 21.14 | 6.83     | 0.83     | 2.91  | 3.09 | 19.73    | 2.4      | 8.41 |
|     | 0    | 38.75 | 6.91     | 1.22     | 2.41  | 3.27 | 20.11    | 3.55     | 7.01 |
|     | 0.17 | 31.67 | 6.59     | 0.95     | 2.5   | 3.14 | 17.53    | 2.53     | 6.65 |
|     | 0    | 30.81 | 6.27     | 0.91     | 2.45  | 3    | 18.49    | 2.68     | 7.23 |
|     | 0    | 31.03 | 9.05     | 1.09     | 3.68  | 4.27 | 20.96    | 2.52     | 8.52 |
|     | 0    | 37.07 | 6.39     | 1.04     | 1.96  | 3.39 | 18.04    | 2.94     | 5.53 |
|     | 0    | 34.51 | 6.64     | 1.32     | 2.41  | 2.91 | 20.18    | 4.01     | 7.32 |
|     |      |       | 7.14     | 1.18     | 2.41  | 3.55 | 22.41    | 3.7      | 7.56 |

| Dltop | AC   | ACbottom | ACmiddle | ACtop | AI   | Albottom | Almiddle | Altop |
|-------|------|----------|----------|-------|------|----------|----------|-------|
| 11.58 | 0.56 | 0.48     | 0.04     | 0.04  | 1.92 | 1.64     | 0.14     | 0.14  |
| 9.94  | 2.09 | 0.14     | 0.18     | 1.77  | 6.25 | 0.42     | 0.54     | 5.29  |
| 10.93 | 1.43 | 0.04     | 0.09     | 1.3   | 4.61 | 0.13     | 0.29     | 4.19  |
| 10.84 | 0.73 | 0        | 0        | 0.73  | 2.32 | 0        | 0        | 2.32  |
| 11.76 | 0.05 | 0        | 0        | 0.05  | 0.14 | 0        | 0        | 0.14  |
| 9.1   | 0.26 | 0        | 0        | 0.26  | 0.78 | 0        | 0        | 0.78  |
|       | 1.6  | 0        | 0.05     | 1.55  | 4.55 | 0        | 0.14     | 4.41  |
| 9.58  | 1.45 | 0        | 0        | 1.45  | 5.02 | 0        | 0        | 5.02  |
| 10.61 | 1.95 | 0        | 0.09     | 1.77  | 5.44 | 0        | 0.25     | 4.94  |
| 10.97 | 2.48 | 0        | 0.04     | 2.43  | 6.66 | 0        | 0.11     | 6.53  |
| 9.83  | 0.41 | 0        | 0        | 0.41  | 1.06 | 0        | 0        | 1.06  |
| 8.93  | 0.45 | 0        | 0        | 0.45  | 1.21 | 0        | 0        | 1.21  |
| 9.52  | 0.86 | 0.45     | 0        | 0.82  | 2.75 | 1.44     | 0        | 2.63  |
| 8.35  | 0.43 | 0        | 0        | 0.43  | 1.17 | 0        | 0        | 1.17  |
| 8.85  | 1.17 | 0        | 0        | 1.17  | 4.1  | 0        | 0        | 4.1   |
| 9.89  | 0.36 | 0        | 0        | 0.36  | 0.86 | 0        | 0        | 0.86  |
| 9.57  | 1.27 | 0.09     | 0.18     | 1     | 4.2  | 0.3      | 0.6      | 3.31  |
| 8.84  | 0.77 | 0        | 0        | 0.77  | 1.99 | 0        | 0        | 1.99  |
| 11.14 | 0.91 | 0        | 0        | 0.91  | 2.91 | 0        | 0        | 2.91  |

| cycliD1colc | CDK2colon | CDK4colon | p21colon | Ecadherinc | p53colon | Totalcell            | TotalPC | BPC  |
|-------------|-----------|-----------|----------|------------|----------|----------------------|---------|------|
| 1           | 1         | 1         | 1        | 1          | 1        | 31.58                | 7.75    | 4.92 |
| 1.37        | 0.81      | 2.19      | 0.59     | 0.84       | 0.66     | 30.5                 | 4.06    | 3.06 |
| 1.67        | 1.2       | 1.39      | 0.93     | 1.24       | 1.94     | Tissue block damaged |         |      |
| 1.64        | 2.29      | 4.23      | 2.17     | 1.33       | 4.19     | 33.3                 | 4.95    | 3.9  |
| 1.37        | 0.73      | 3.47      | 0.73     | 1.22       | 1.35     | 35.38                | 4.63    | 2.63 |
| 3.1         | 3.61      | 2.16      | 2.59     | 2.17       | 3.34     | 33                   | 7       | 5    |
| 2.75        | 3.58      | 1.66      | 0.34     | 1.4        | 5.04     | 34.89                | 5.22    | 4.33 |
| 3           | 1.5       | 2.34      | 1.34     | 0.82       | 3.15     | 35.98                | 4.59    | 3.61 |
| 2.01        | 0.53      | 1.16      | 0.98     | 0.39       | 0.66     | Tissue block damaged |         |      |
| 1.33        | 0.34      | 1.67      | 0.5      | 0.52       | 0.59     | Tissue block damaged |         |      |
| 3.29        | 1.54      | 1.84      | 1.39     | 0.97       | 1.92     | 35                   | 4.05    | 3    |
| 6.1         | 2.36      | 5.33      | 2.13     | 2.03       | 4.64     | 37.63                | 5.63    | 4.88 |
| 2.93        | 1.75      | 1.18      | 1.5      | 1.15       | 2.54     | 37.36                | 2.55    | 2.09 |
| 1.77        | 1.3       | 2.27      | 1.07     | 1.14       | 2.18     | 33.5                 | 3.56    | 2.81 |
| 1.36        | 0.71      | 1.58      | 0.57     | 0.88       | 1.08     | 27.74                | 3.52    | 2.26 |
| 0.98        | 0.34      | 1.52      | 3.65     | 0.82       | 0.52     | 33.5                 | 3.22    | 2.56 |
| 1.07        | 0.6       | 1.47      | 0.41     | 1.06       | 1.73     | 39.82                | 4       | 3.09 |
| 0.5         | 0.4       | 1.43      | 3.46     | 0.73       | 5.95     | 34.1                 | 2.7     | 2.2  |
| 2.31        | 0.87      | 1.7       | 0.57     | 1.4        | 1.01     | 29.5                 | 1.25    | 1.25 |
| 5.07        | 1.17      | 7.39      | 0.79     | 1.05       | 1.67     | 42.73                | 3.45    | 2.18 |
| 1           | 0.36      | 1.46      | 0.25     | 0.78       | 0.76     | 32.37                | 2.68    | 2    |
| 0.55        | 0.23      | 0.48      | 0.2      | 0.28       | 0.3      | 39                   | 2.33    | 1.55 |
| 0.95        | 0.36      | 0.83      | 0.27     | 0.54       | 0.28     | Tissue block damaged |         |      |
| 0.16        | 0.14      | 0.24      | 2.46     | 0.12       | 2.98     | Tissue block damaged |         |      |



| DCbottom | DCmiddle | DCtop | DI    | DIbottom | DImiddle | DItop | AC                   | ACbottom |
|----------|----------|-------|-------|----------|----------|-------|----------------------|----------|
| 0.82     | 2.64     | 3.41  | 19.73 | 2.36     | 7.59     | 9.81  | 1.67                 | 0        |
| 0.73     | 2.05     | 2.32  | 14.37 | 2.06     | 5.77     | 6.54  | 0.36                 | 0        |
|          |          |       |       |          |          |       | Tissue block damaged |          |
| 0.86     | 2.32     | 3.32  | 19.61 | 2.6      | 7        | 10.02 | 0.14                 | 0        |
| 0.86     | 2.19     | 3.67  | 19.47 | 2.49     | 6.34     | 10.63 | 0.14                 | 0        |
| 0.86     | 2.77     | 3.73  | 19.28 | 2.25     | 7.26     | 9.77  | 0.59                 | 0        |
| 0.94     | 2.18     | 3.18  | 18.21 | 2.72     | 6.3      | 9.19  | 0                    | 0        |
| 1.45     | 3.14     | 3.41  | 22.37 | 4.05     | 8.78     | 9.53  | 0                    | 0        |
| 0.69     | 2.06     | 2.75  | 17.32 | 2.17     | 6.49     | 8.66  | 0.5                  | 0        |
| 0.86     | 1.91     | 2.65  | 16.6  | 2.63     | 5.85     | 8.12  | 0.41                 | 0        |
| 0.87     | 3.26     | 3.83  | 23.84 | 2.61     | 9.76     | 11.47 | 1.59                 | 0        |
| 1        | 2.82     | 3.09  | 19.61 | 2.84     | 8        | 8.77  | Tissue block damaged |          |
| 0.63     | 1.73     | 2.5   | 15.23 | 1.95     | 5.37     | 7.75  | Tissue block damaged |          |
| 0.32     | 1.32     | 1.41  | 9.09  | 0.95     | 3.93     | 4.2   | 0.41                 | 0        |
| 0.55     | 1.55     | 3     | 18.61 | 2.01     | 5.65     | 10.94 | 0.27                 | 0        |
| 0.64     | 1.94     | 2.64  | 17.39 | 2.19     | 6.63     | 9.02  | 0.23                 | 0        |
| 0.64     | 2.16     | 2.76  | 16.75 | 1.93     | 6.51     | 8.31  | 0.27                 | 0        |
| 0.68     | 1.41     | 2.82  | 15.26 | 2.11     | 4.38     | 8.76  | 0.05                 | 0        |
| 0.76     | 1.47     | 2.47  | 18.62 | 3.01     | 5.82     | 9.79  | 0.55                 | 0        |
| 0.48     | 1.26     | 2.09  | 13.34 | 1.67     | 4.39     | 7.28  | 0.23                 | 0        |
| 0.82     | 2.09     | 2.68  | 18.33 | 2.69     | 6.85     | 8.79  | 0.14                 | 0        |
| 0.36     | 1.59     | 2.72  | 16.09 | 1.24     | 5.47     | 9.35  | 0.05                 | 0        |
| 0.81     | 2.81     | 2.5   | 18.85 | 2.8      | 9.72     | 8.65  | Tissue block damaged |          |
| 0.43     | 1.73     | 2.32  | 15.92 | 1.52     | 6.12     | 8.21  | Tissue block damaged |          |

| ACmiddle | ACtop | AI   | Albottom | Almiddle | Altop | cycliD1colc | CDK2colon | CDK4colon |
|----------|-------|------|----------|----------|-------|-------------|-----------|-----------|
| 0        | 1.67  | 5.36 | 0        | 0        | 5.36  | 1           | 1         | 1         |
| 0        | 0.36  | 0.99 | 0        | 0        | 0.99  | 1.63        | 1.21      | 0.7       |
|          |       |      |          |          |       | 0.38        | 1.65      | 0.7       |
| 0        | 0.14  | 0.42 | 0        | 0        | 0.42  | 7.97        | 5.69      | 0.65      |
| 0        | 0.14  | 0.43 | 0        | 0        | 0.43  | Sample lost |           |           |
| 0        | 0.59  | 1.82 | 0        | 0        | 1.82  | Sample lost |           |           |
| 0        | 0     | 0    | 0        | 0        | 0     | 0.89        | 1.27      | 0.22      |
| 0        | 0     | 0    | 0        | 0        | 0     | 6.89        | 0.19      | 0.36      |
| 0        | 0.5   | 1.79 | 0        | 0        | 1.79  | 1.28        | 1.8       | 0.55      |
| 0        | 0.41  | 1.29 | 0        | 0        | 1.29  | 1.19        | 1.85      | 0.41      |
| 0.14     | 1.45  | 5.12 | 0        | 0.45     | 4.67  | 0.52        | 0.58      | 0.28      |
|          |       |      |          |          |       | 1.51        | 1.31      | 0.21      |
|          |       |      |          |          |       | 3.23        | 2.64      | 1.12      |
| 0        | 0.41  | 1.37 | 0        | 0        | 1.37  | 0.41        | 0.37      | 0.22      |
| 0        | 0.27  | 1.01 | 0        | 0        | 1.01  | Sample lost |           |           |
| 0        | 0.23  | 0.68 | 0        | 0        | 0.68  | 2.15        | 1.27      | 1.22      |
| 0        | 0.27  | 0.83 | 0        | 0        | 0.83  | Sample lost |           |           |
| 0        | 0.05  | 0.15 | 0        | 0        | 0.15  | 1.01        | 0.99      | 0.4       |
| 0        | 0.55  | 2.05 | 0        | 0        | 2.05  | 0.47        | 0.5       | 0.07      |
| 0        | 0.23  | 0.7  | 0        | 0        | 0.7   | 0.23        | 0.38      | 1.06      |
| 0        | 0.14  | 0.41 | 0        | 0        | 0.41  | 0.87        | 1.6       | 1.12      |
| 0        | 0.05  | 0.17 | 0        | 0        | 0.17  | 3.82        | 1.05      | 1.04      |
|          |       |      |          |          |       | 0.58        | 0.61      | 0.35      |
|          |       |      |          |          |       | 0.56        | 0.79      | 0.11      |

p21colon Ecadherinc p53colon

| 1    | 1    | 1    |
|------|------|------|
| 1.56 | 1.93 | 1.16 |
| 0.28 | 0.17 | 0.16 |
| 0.15 | 0.16 | 0.07 |

|      |      |      |
|------|------|------|
| 1.74 | 0.18 | 0.65 |
| 0.14 | 0.01 | 0.02 |
| 1.31 | 0.59 | 1.07 |
| 1.99 | 0.46 | 1.28 |
| 0.53 | 0.14 | 0.4  |
| 1.23 | 0.55 | 1.12 |
| 3.25 | 2.1  | 4.22 |
| 0.28 | 0.11 | 0.2  |

|      |      |      |
|------|------|------|
| 3.93 | 0.06 | 1.13 |
|------|------|------|

|      |      |      |
|------|------|------|
| 1.05 | 0.62 | 1.81 |
| 0.61 | 0.11 | 0.3  |
| 1.27 | 1.54 | 1.33 |
| 6.79 | 0.04 | 0.09 |
| 4.94 | 1.02 | 0.19 |
| 0.57 | 0.24 | 0.52 |
| 0.78 | 0.11 | 0.33 |
